# Supplementary material for: Viral RNA Genomes Identified from Marine Macroalgae and a Diatom
Source: PubMed Central journal article supplement (PMC7511793; doi:10.1264/jsme2.me20016), 2020-06-17
Supplement: 35_20016_s1.pdf [file 35_20016_s1.pdf]

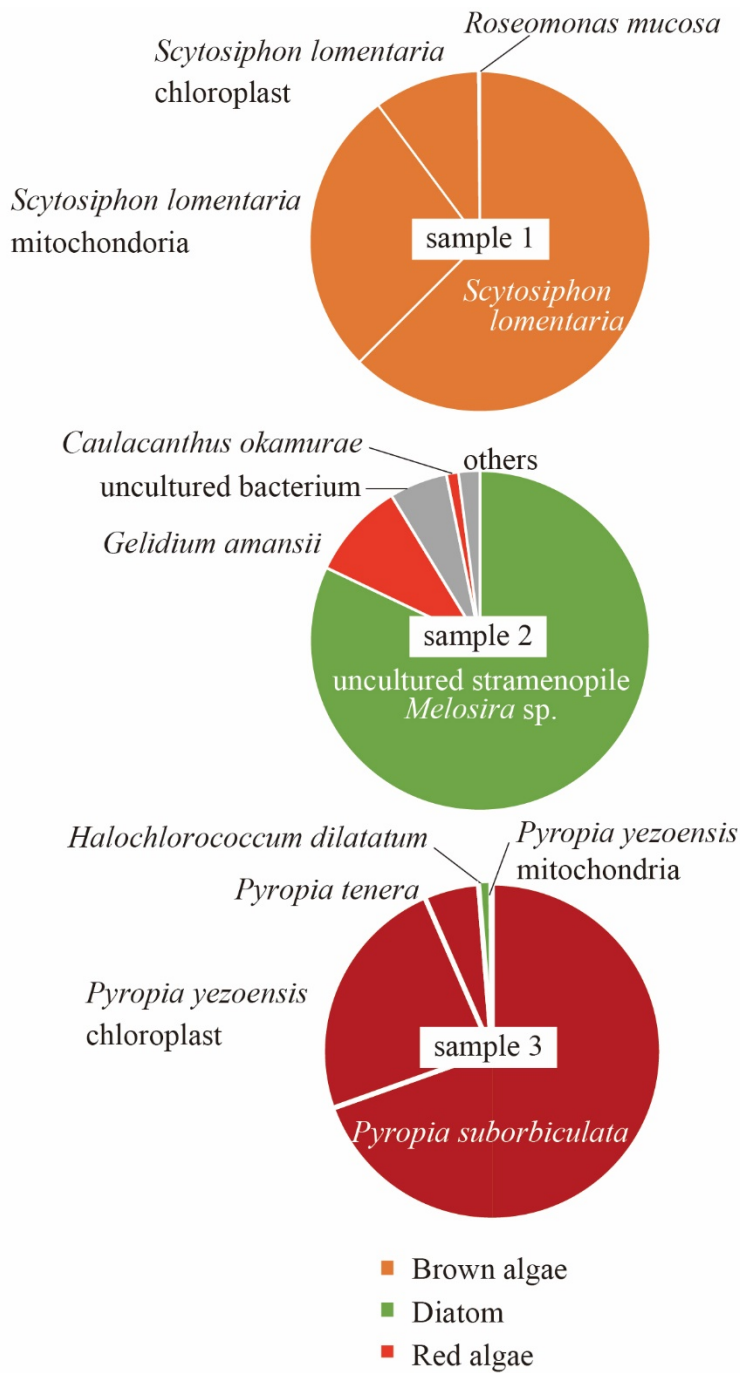

1

2 Fig. S1: Relative abundance of sequence reads mapped on the rRNA sequences constructed by

3 EMIRGE. OTUs with relative abundance of 1% or less were summarized as others.

4

5

DiTV1

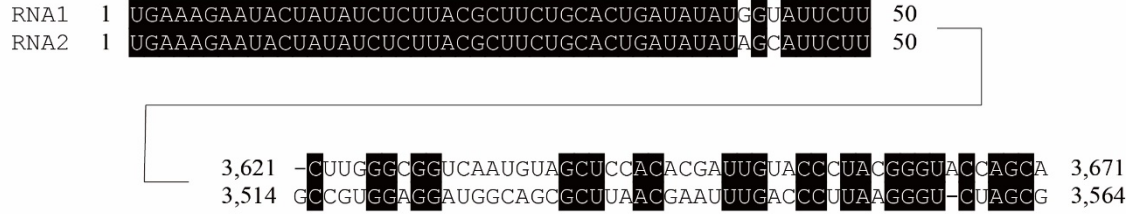

RaTV1

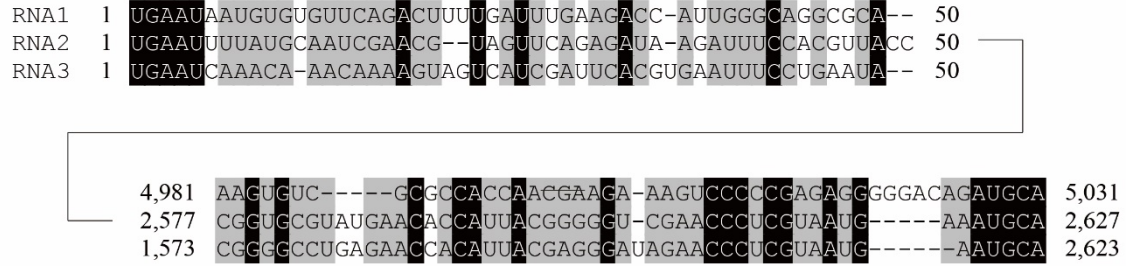

6

7 Fig. S2: Multiple alignments of the 5' - and 3' -terminal regions of the coding strands of RNA

8 segments.

9

10

11

(A)

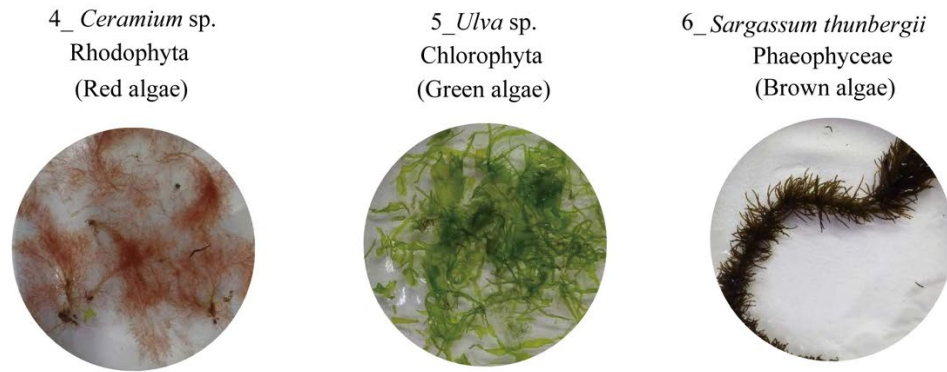

(B)

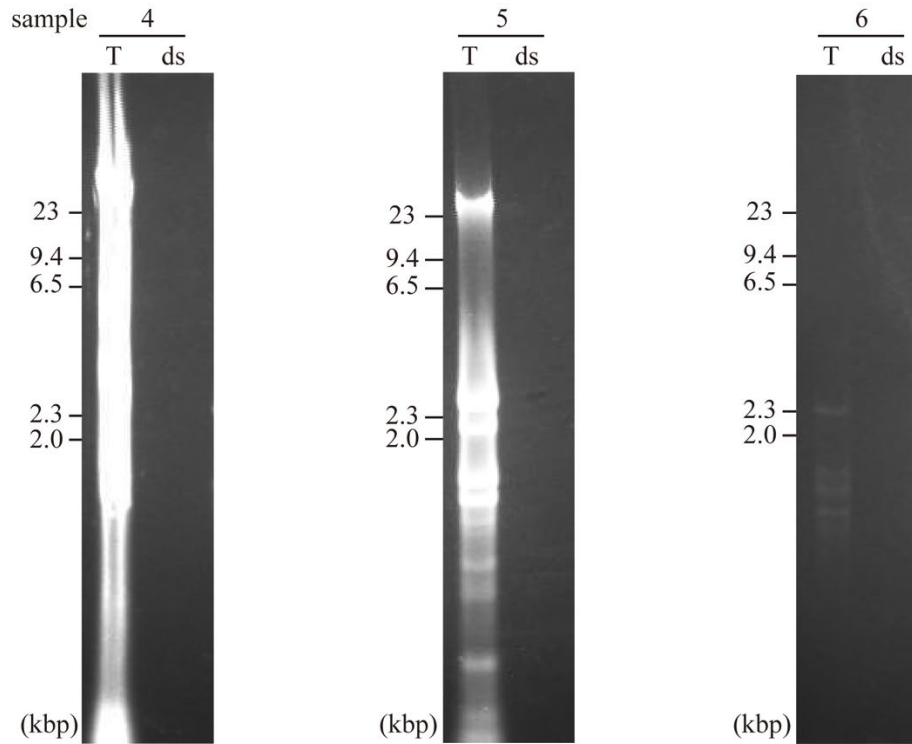

12

13 Fig. S3: dsRNA-negative marine macroalgae used in this study. (A). Identification and morphology  
14 of marine macroalgae samples 4-6. They were identified by morphology. (B) Agarose gel  
15 electrophoresis of the total nucleic acids (T) and dsRNA (ds) of marine macroalgae samples 4-6.  
16 Nucleic acids were stained with ethidium bromide.

Table S1

| virus                      | segment | RdRp domain | dsRNA library    |                  |                              |                            |
|----------------------------|---------|-------------|------------------|------------------|------------------------------|----------------------------|
|                            |         |             | total read count | average coverage | % in trimmed reads (segment) | % in trimmed reads (virus) |
| Brown algae endornavirus 1 |         | Yes         | 1,035,989        | 18,432.2         | 48.5                         | 48.5                       |
| Brown algae endornavirus 2 |         | Yes         | 409,077          | 8,181.6          | 19.2                         | 19.2                       |
| Brown algae RNA virus 1    |         | Yes         | 528,797          | 15,180.5         | 24.8                         | 24.8                       |
| Diatom RNA virus 1         |         | Yes         | 562,244          | 18,090.4         | 50.5                         | 50.5                       |
| Diatom totivirus 1         | 1       |             | 219,879          | 13,489.8         | 19.8                         |                            |
|                            | 2       | Yes         | 61,980           | 3,961.4          | 5.6                          | 25.4                       |
| Red algae totivirus 1      | 1       | Yes         | 6,868            | 318.8            | 20.3                         |                            |
|                            | 2       |             | 12,403           | 1,156.3          | 36.7                         |                            |
|                            | 3       |             | 5,730            | 531.3            | 17.0                         | 74.0                       |

Table S2

| virus                      | segment | BlastN                                                           |              |                          |          |
|----------------------------|---------|------------------------------------------------------------------|--------------|--------------------------|----------|
|                            |         | top hit virus                                                    | accession No | family                   | E-value  |
| Brown algae endornavirus 1 |         | Bell pepper alphaendornavirus isolate Chocolate                  | MG545536     | Endornaviridae           | 6.00E-09 |
| Brown algae endornavirus 2 |         | Rhoviria sp. isolate H1 Bulk Litter 6 scaffold 32                | MN034496.1   | unclassified RNA viruses | 2.00E-16 |
| Brown algae RNA virus 1    |         | No hit                                                           |              |                          |          |
| Diatom RNA virus 1         |         | Diatom colony associated dsRNA virus 16                          | NC_040310.1  | unclassified RNA viruses | 1.00E-47 |
| Diatom totivirus 1         | 1       | Zebrafish DNA sequence from clone DKEY-262J3 in linkage group 14 | CT573264.9   |                          | 3.00E-11 |
|                            | 2       | Diatom colony associated virus-Like RNA                          | AP014917.1   | unclassified RNA viruses | 6.00E-13 |
|                            | 1       | Diatom colony associated dsRNA virus 10                          | NC_040659.1  | unclassified RNA viruses | 2.00E-05 |
|                            | 2       | No hit                                                           |              |                          |          |
|                            | 3       | No hit                                                           |              |                          |          |

| BlastX   |                                         |              |              |                          |           |          |
|----------|-----------------------------------------|--------------|--------------|--------------------------|-----------|----------|
| identity | top hit virus                           | top hit gene | accession No | family                   | E-value   | identity |
| 92 %     | Winged bean alphaendornavirus 1         | polyprotein  | YP_009305414 | Endornaviridae           | 7.00E-115 | 41 %     |
| 67 %     | Soybean leaf-associated endornavirus 1  | RdRp         | ALM62234     | Endornaviridae           | 4.00E-113 | 43 %     |
|          | Hubei virga-like virus 17               | RdRp         | YP_009337715 | unclassified RNA viruses | 1.00E-70  | 28 %     |
| 66 %     | Diatom colony associated dsRNA virus 16 | RdRp         | YP_009551333 | unclassified viruses     | 0         | 56 %     |
| 73 %     | Diatom colony associated virus-Like RNA | coat protein | BAU79523     | Totiviridae              | 2E-133    | 38 %     |
| 72 %     | Diatom colony associated virus-Like RNA | RdRp         | BAU79524     | Totiviridae              | 0         | 46 %     |
| 68 %     | Thelebolus microsporus toti virus 1     | RdRp         | AZT88643     | Totiviridae              | 1.00E-154 | 38 %     |
|          | No hit                                  |              |              |                          |           |          |
|          | No hit                                  |              |              |                          |           |          |
